# Supplementary material for: Electrophoresis of metal-dielectric Janus particles with dipolar director symmetry in nematic liquid crystals
Source: Royal Society of Chemistry journal article supplement (doi:10.1039/d1sm01653a), 2022-01-01
Supplement: d1sm01653a3.pdf [file d1sm01653a3.pdf]

## Supplementary materials for

# Electrophoresis of metal-dielectric Janus particles with dipolar director symmetry in nematic liquid crystals

*Dinesh Kumar Sahu and Surajit Dhara\**

*School of Physics, University of Hyderabad, Hyderabad 500046, India*

\*To whom correspondence should be addressed: [surajit@uohyd.ac.in](mailto:surajit@uohyd.ac.in)

**Movie S1:** Janus dipolar particles with different orientations of the metal hemisphere moving along the director in 5CB with their direction of motion parallel to the elastic dipole  $\vec{p}$ . The ac electric field is applied ( $65 \text{ mV}\mu\text{m}^{-1}$ , 30 Hz) parallel to the director.

**Movie S2:** Janus dipolar particles with different orientations of the metal hemisphere, moving along the director in MLC-6608 with their direction of motion antiparallel to the elastic dipole moment  $\vec{p}$ . The applied ac field ( $2.0 \text{ V}\mu\text{m}^{-1}$ , 30 Hz) is perpendicular to the director.
